# Supplementary material for: A novel CoNi7O8/MnO2 nanocomposite supported on Ni foam as a peroxymonosulfate activator for the highly efficient singlet oxygen mediated removal of methylene blue
Source: Royal Society of Chemistry journal article supplement (doi:10.1039/d2nj00112h), 2022-01-01
Supplement: d2nj00112h1.pdf [file d2nj00112h1.pdf]

# A Novel $\text{CoNi}_7\text{O}_8/\text{MnO}_2$ Nanocomposite Supported on Ni Foam as Peroxymonosulfate Activator for Highly Efficient Singlet Oxygen Mediated Removal of Methylene Blue

Jiankang Wang <sup>a,\*</sup>,<sup>1</sup>, Rong Peng <sup>a,1</sup>, Kui Chen <sup>a</sup>, Yajing Wang <sup>a</sup>, Taiping Xie <sup>a,\*</sup>, Quanxi Zhu <sup>a</sup>,  
Yuan Peng <sup>a</sup>, Songli Liu <sup>a</sup>, Zhongping Yao <sup>b</sup>

<sup>a</sup> School of materials science and engineering, Yangtze Normal University, Chongqing 408100, China

<sup>b</sup> School of Chemistry and Chemical Engineering, State Key Laboratory of Urban Water Resource and Environment, Harbin Institute of Technology, Harbin 150001, PR China

\* Corresponding authors.

E-mail address: wjkwjk074478@163.com (Jiankang Wang); deartaiping@163.com (Taiping Xie).

<sup>1</sup> Jiankang Wang and Rong Peng contributed equally to this work and should be considered as co-first authors.

Table S1 The elemental composition in  $\text{CoNi}_7\text{O}_8/\text{MnO}_2/\text{NF}$  obtained by SEM-EDS analysis

| Element | Mass content (%) |
|---------|------------------|
| Ni      | 68.2             |
| Mn      | 7.7              |
| Co      | 7.0              |
| O       | 17.0             |

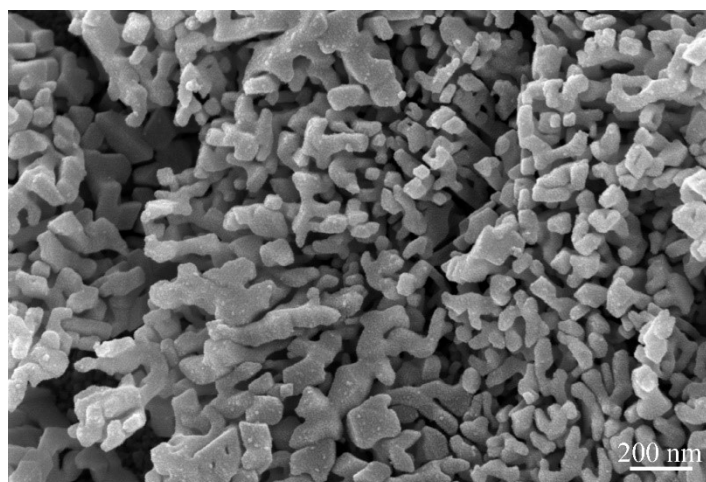

Fig. S1 SEM image of  $\text{CoNi}_7\text{O}_8/\text{NF}$

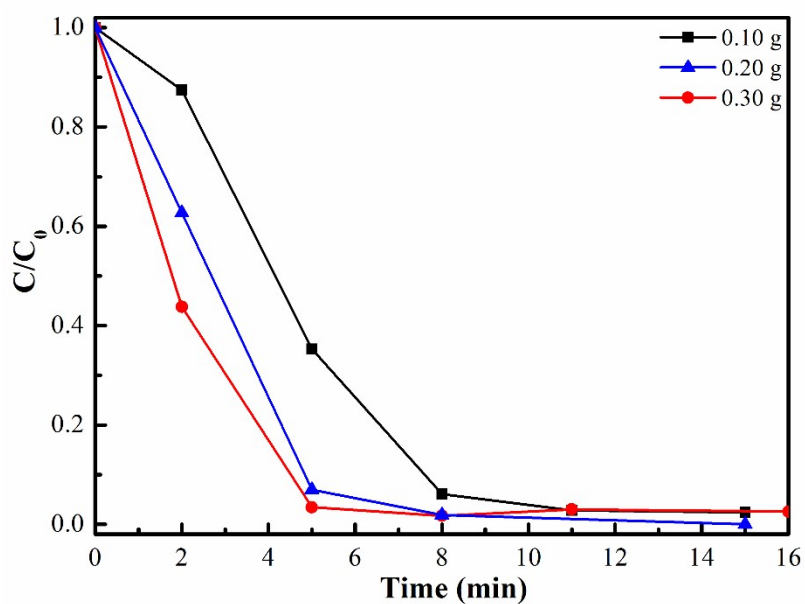

Fig. S2 Effect of  $\text{CoCl}_2 \cdot 6\text{H}_2\text{O}$  content on MB removal by  $\text{CoNi}_7\text{O}_8/\text{MnO}_2/\text{NF}$   
 (Reaction conditions:  $[\text{MB}]_0 = 20 \text{ mg/L}$ ,  $[\text{PMS}]_0 = 0.5 \text{ g/L}$ , initial pH 5.9 and  $T = 30 \text{ }^\circ\text{C}$ )

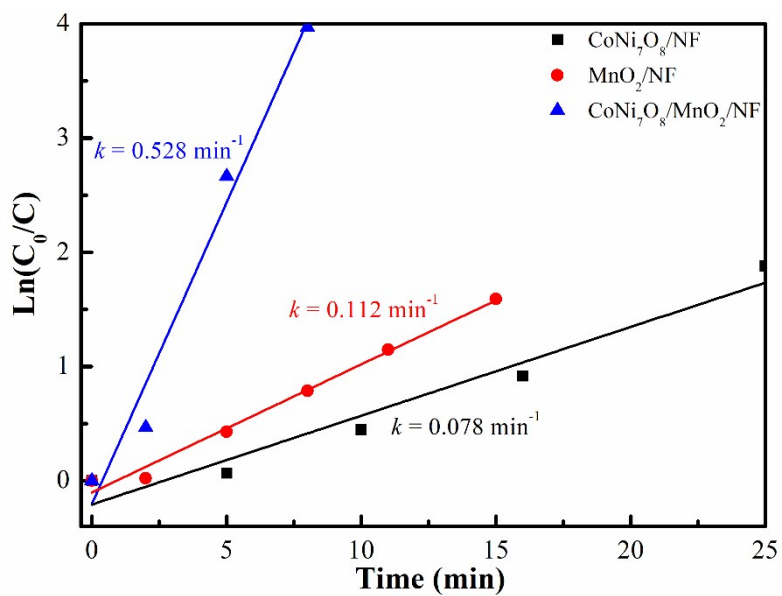

Fig. S3 The reaction kinetic curves of MB removal by different catalytic systems

Table S2 The comparison of catalytic performances of CoNi<sub>7</sub>O<sub>8</sub>/MnO<sub>2</sub>/NF with the previously reported catalysts

| Catalysts                                                                           | PMS dosage (g/L) | MB concentration (mg/L) | pH   | Removal efficiency (%) | <i>k</i> (min <sup>-1</sup> ) | Ref.      |
|-------------------------------------------------------------------------------------|------------------|-------------------------|------|------------------------|-------------------------------|-----------|
| CoNi <sub>7</sub> O <sub>8</sub> /MnO <sub>2</sub> /NF                              | 0.5              | 20                      | 5.9  | 100 (15 min)           | 0.528                         | This work |
| Cu@Co-MOFs                                                                          | 0.614            | 64                      | 5.0  | 100 (30 min)           | 0.109                         | [1]       |
| FexOy/N-GN/CNTs                                                                     | 1.228            | 100                     | 7.62 | 100 (20 min)           | 0.33444                       | [2]       |
| Mn <sub>3</sub> O <sub>4</sub>                                                      | 1.88             | 62                      | 4.0  | 86.71 (20 min)         | 0.005                         | [3]       |
| Ag-La <sub>0.8</sub> Ca <sub>0.2</sub> Fe <sub>0.94</sub> O <sub>3-δ</sub> (Ag-LCF) | 0.368            | 10                      | /    | 90 (75 min)            | /                             | [4]       |
| CoFe <sub>2</sub> O <sub>4</sub>                                                    | 0.3              | 20                      | 6.3  | 97.9% (75 min)         | 0.114                         | [5]       |
| CuFe <sub>2</sub> O <sub>4</sub> @GO                                                | 0.491            | 200                     | 7.0  | 93.3% (30 min)         | /                             | [6]       |

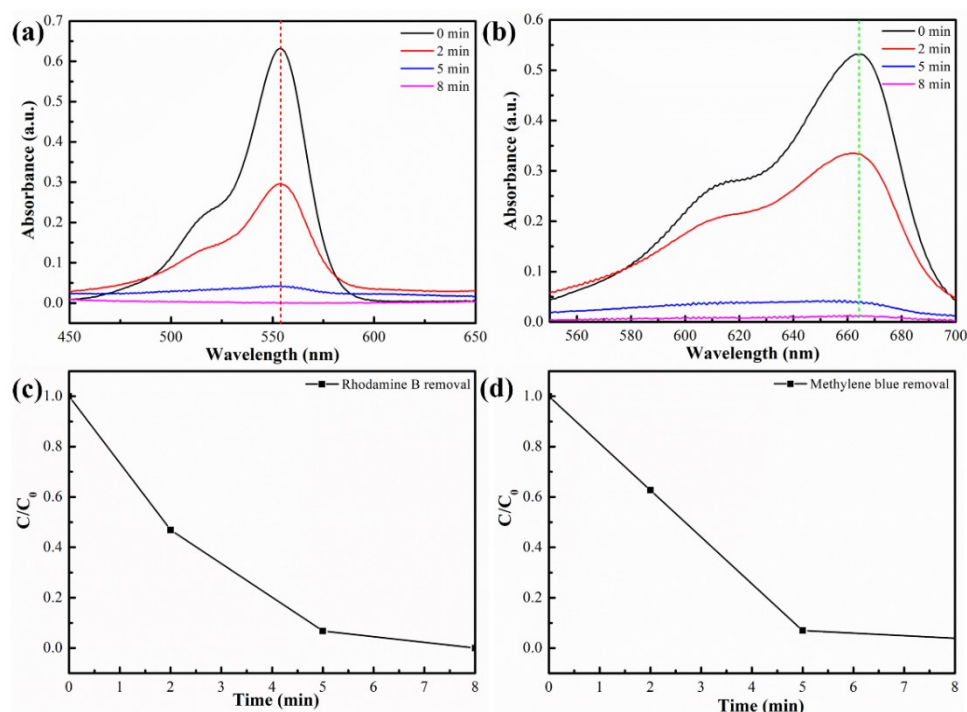

Fig. S4 Time-dependent UV-vis absorption spectra and corresponding removal efficiency curves of RhB (a, c) and MB (b, d)

(Reaction conditions: [MB]<sub>0</sub> and [RhB]<sub>0</sub> = 20 mg/L, [PMS]<sub>0</sub> = 0.5 g/L, initial pH 5.9 and *T* = 30

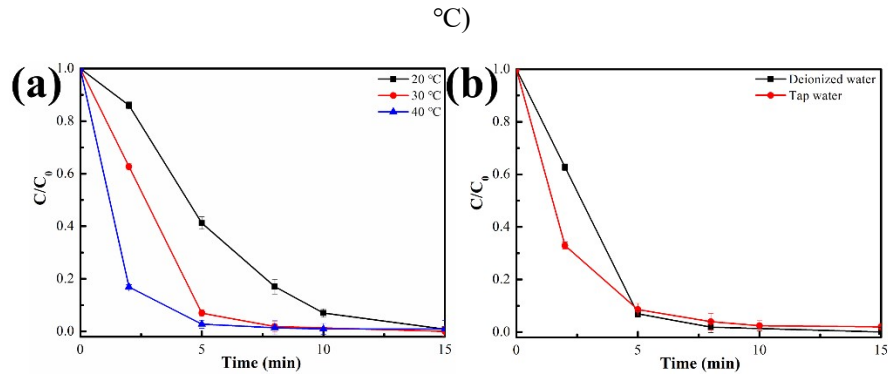

Fig. S5 Influences of temperature and water type on MB removal

(Reaction condition:  $[MB]_0 = 20$  mg/L,  $[PMS]_0 = 0.5$  g/L, initial pH 5.9 and  $T = 30$  °C)

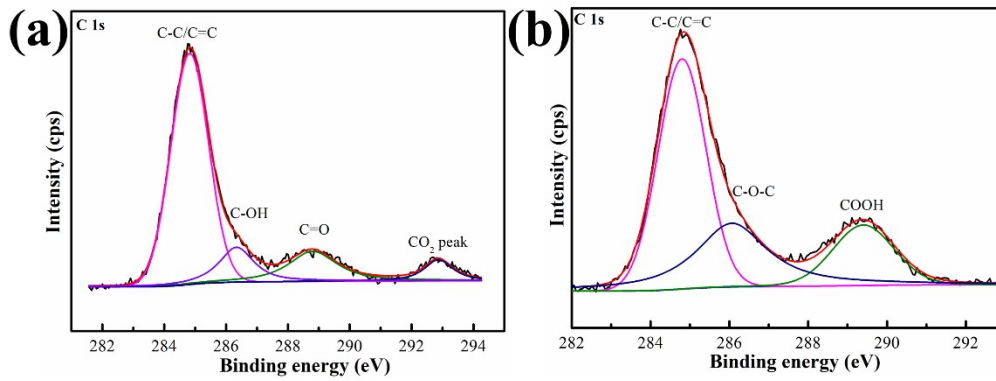

Fig. S6 High-resolution C 1s XPS spectra of fresh (a) and used (b)  $CoNi_7O_8/MnO_2/NF$

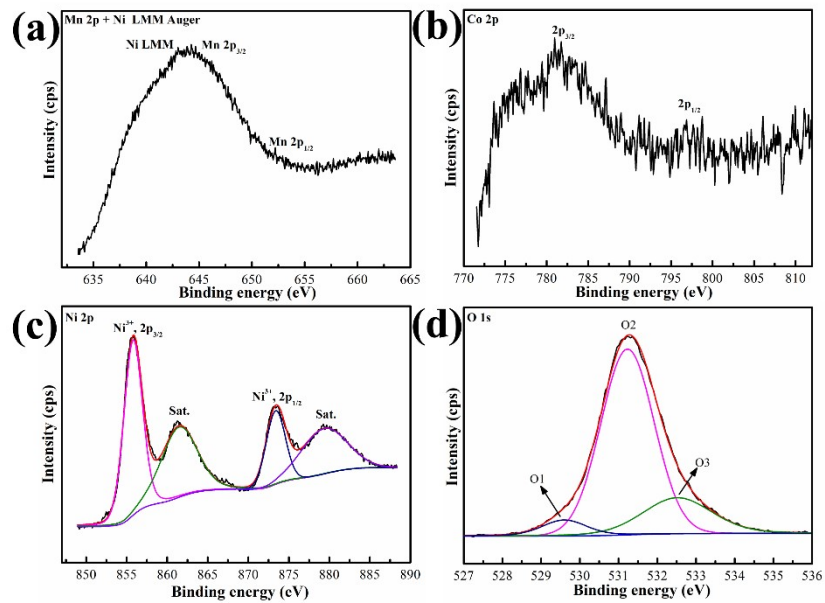

Fig. S7 High-resolution Mn 2p (a), Co 2p (b), Ni 2p (c) and O 1s (d) XPS spectra of used  $CoNi_7O_8/MnO_2/NF$

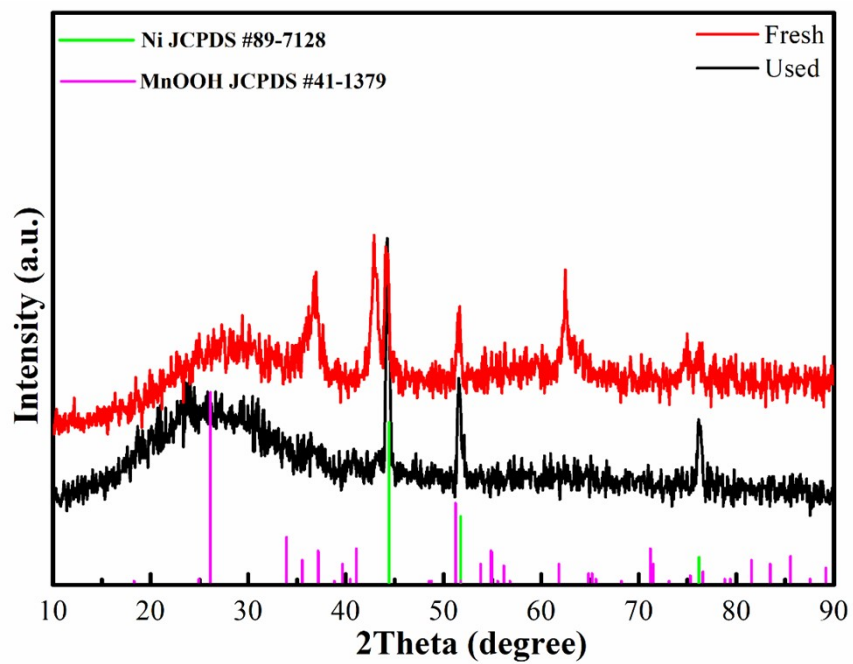

Fig. S8 XRD patterns of fresh and used CoNi<sub>7</sub>O<sub>8</sub>/MnO<sub>2</sub>/NF

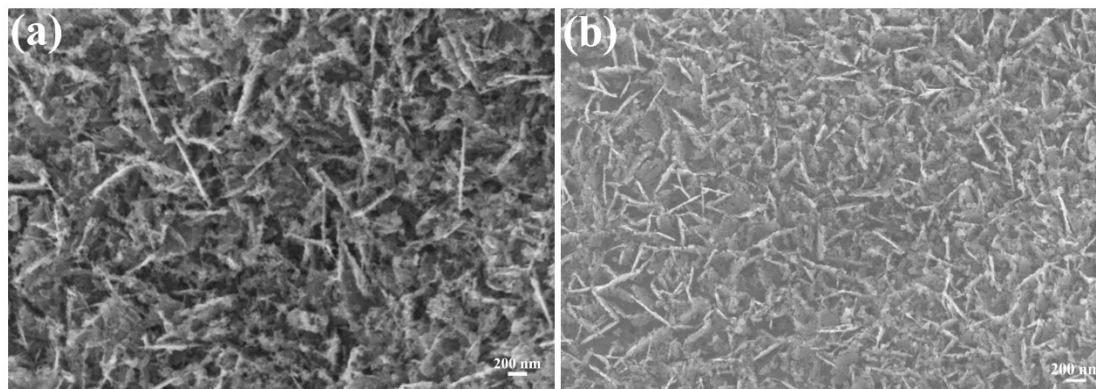

Fig. S9 SEM images of fresh (a) and used (b) CoNi<sub>7</sub>O<sub>8</sub>/MnO<sub>2</sub>/NF

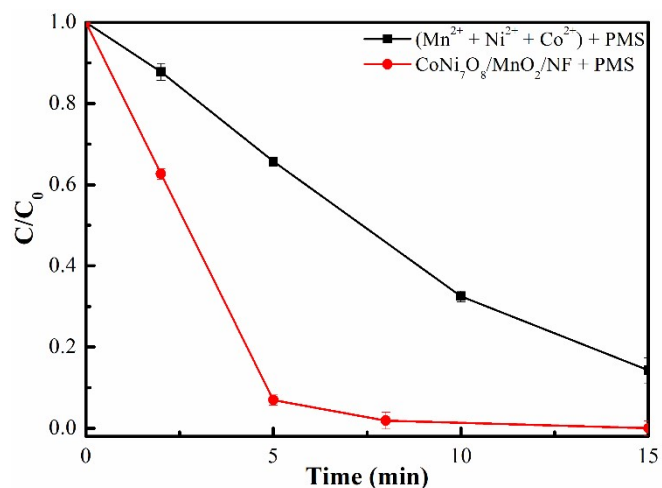

Fig. S10 The impact of homogeneous catalysis on MB removal

(Reaction conditions:  $[MB]^0 = 20 \text{ mg/L}$ ,  $[PMS]^0 = 0.5 \text{ g/L}$ , initial pH 5.9 and  $T = 30 \text{ }^\circ\text{C}$ )

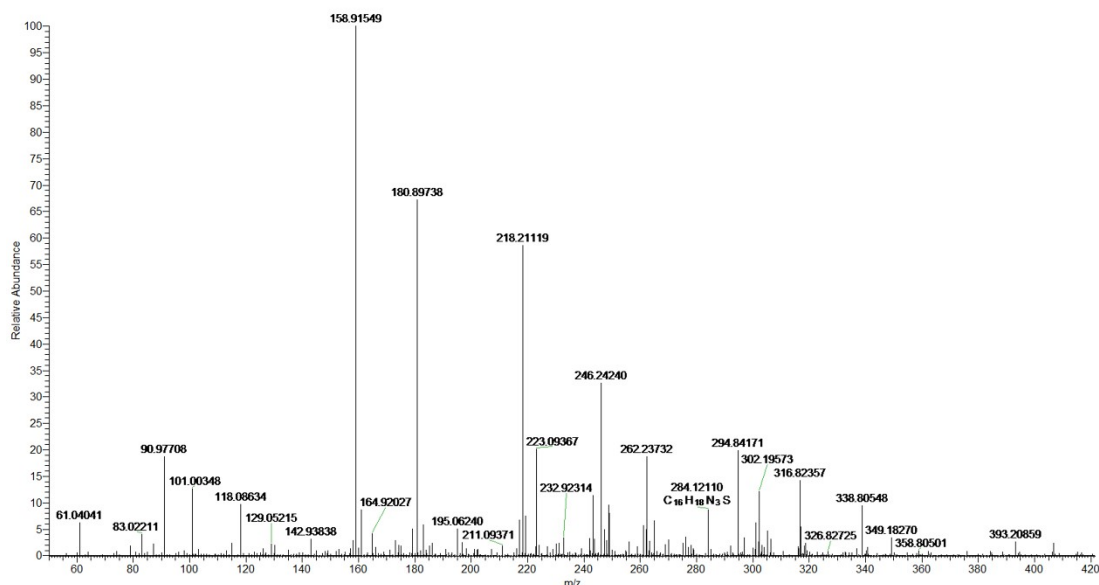

Fig. S11 LC-MS spectrum of MB degradation solution after reaction of 15min

## References

- [1] H. Li, S. Xu, J. Du, et al. Cu@Co-MOFs as a novel catalyst of peroxymonosulfate for the efficient removal of methylene blue[J]. RSC Advances, 2019, 9 (17): 9410-9420.
- [2] X. Zhao, Q. D. An, Z. Y. Xiao, et al. One-step preparation of Fe<sub>x</sub>O<sub>y</sub>/N-GN/CNTs heterojunctions as a peroxymonosulfate activator for relatively highly-efficient methylene blue degradation[J]. Chinese Journal of Catalysis, 2018, 39 (11): 1842-1853.

- [3] R. Shokoohi, M. Khazaei, K. Godini, et al. Degradation and mineralization of methylene blue dye by peroxymonosulfate/Mn<sub>3</sub>O<sub>4</sub> nanoparticles using central composite design: Kinetic study[J]. *Inorganic Chemistry Communications*, 2021, 127: 108501.
- [4] T. Ma, L. Liu, B. Meng, et al. Heterogeneous activation of peroxymonosulfate via a Ag-La<sub>0.8</sub>Ca<sub>0.2</sub>Fe<sub>0.94</sub>O<sub>3-δ</sub> perovskite hollow fibre membrane reactor for dye degradation[J]. *Separation and Purification Technology*, 2019, 211: 298-302.
- [5] K. Zhang, D. Sun, C. Ma, et al. Activation of peroxymonosulfate by CoFe<sub>2</sub>O<sub>4</sub> loaded on metal-organic framework for the degradation of organic dye[J]. *Chemosphere*, 2020, 241: 125021.
- [6] X. Lei, M. You, F. Pan, et al. CuFe<sub>2</sub>O<sub>4</sub>@GO nanocomposite as an effective and recoverable catalyst of peroxymonosulfate activation for degradation of aqueous dye pollutants[J]. *Chinese Chemical Letters*, 2019, 30 (12): 2216-2220.
